1                   ***Bdellovibrio* and Like Organisms are Predictors of**  
2                   **Microbiome Diversity in distinct Host Groups**

3  
4                   **Julia Johnke<sup>1</sup>, Sebastian Fraune<sup>2</sup>, Thomas Bosch<sup>2</sup>, Ute Hentschel<sup>3,4</sup>, and**  
5                   **Hinrich Schulenburg<sup>1\*</sup>**

6  
7                   <sup>1</sup>Department of Evolutionary Ecology and Genetics, Zoological Institute, CAU Kiel,  
8                   Am Botanischen Garten 1-9, 24118 Kiel, Germany

9  
10                   <sup>2</sup>Department of Cell and Developmental Biology, Zoological Institute, CAU Kiel, Am  
11                   Botanischen Garten 1-9, 24118 Kiel, Germany

12  
13                   <sup>3</sup>RD3 Marine Microbiology, GEOMAR Helmholtz Centre for Ocean Research Kiel,  
14                   Düsternbrooker Weg 20, 24105 Kiel, Germany.

15  
16                   <sup>4</sup>Section of Marine Biology, CAU Kiel, Am Botanischen Garten 1-9, 24118 Kiel,  
17                   Germany.

18  
19                   \* **Correspondence:**

20                   Hinrich Schulenburg  
21                   hschulenburg@zoologie.uni-kiel.de  
22                   +49 431 880 4141

23  
24                   **Keywords: biodiversity, predator, prey, microbiome, *Bdellovibrio***

25  
26                   The nucleotide sequence data reported are available in the EMBL databases under  
27                   the accession number PRJEB30476.

28 **Abstract**

29

30 Biodiversity is generally believed to be a main determinant of ecosystem functioning.  
31 This principle also applies to the microbiome and could consequently contribute to host  
32 health. According to ecological theory, communities are shaped by top predators  
33 whose direct and indirect interactions with community members cause stability and  
34 diversity. *Bdellovibrio* and like organisms (BALOs) are a neglected group of predatory  
35 bacteria that feed on Gram-negative bacteria and can thereby influence microbiome  
36 composition. We asked whether BALOs can predict biodiversity levels in microbiomes  
37 from distinct host groups and environments. We demonstrate that genetic signatures  
38 of BALOs are commonly found within the 16S rRNA reads from diverse host taxa. In  
39 many cases, their presence, abundance, and especially richness are positively  
40 correlated with overall microbiome diversity. Our findings suggest that BALOs can act  
41 as drivers of microbial alpha-diversity and should therefore be considered as  
42 candidates for the restoration of microbiomes and the prevention of dysbiosis.

43 Biodiversity is a key attribute of productive [1] and stable ecosystems [2]. This is likely  
44 due to the activity of highly productive keystone species [3], which are often more  
45 common in species-rich communities [1]. Nevertheless, productivity and stability  
46 appear to be mainly driven by diversity itself and not by individual taxa [4]. Species-  
47 rich communities exist for example in the human gut and oral microbiome and are  
48 usually assumed to consist of functionally redundant species that act as insurance in  
49 case of extinctions [5, 6]. Consequently, species-rich communities are more resilient  
50 (cf. [7]). To date, most studies on the effect of biodiversity on ecosystem functioning  
51 and specifically the effect of microbiome composition on host health have focused on  
52 a single trophic level. Yet, changes in the diversity of one trophic level can affect other  
53 trophic levels, either directly through consumer-resource interactions or indirectly when  
54 the decrease of one species leads to abundance changes of other species [8]. The  
55 presence of top predators has particularly strong effects because they can limit  
56 dominant species abundance and thereby free niches for rare taxa [9–11]. The impact  
57 of predators is likely distinct from environmental stressors, which may similarly free  
58 niches and subsequently increase microbiome diversity, as recently documented for  
59 the microbiome of *Daphnia* waterfleas after antibiotic exposure [12]. Yet, in this case,  
60 the effect on community composition is likely to be random, whereas predators usually  
61 target the dominant species.

62 *Bdellovibrio* and like organisms (BALOs) are obligate predators of Gram-negative  
63 bacteria in a wide range of habitats [13, 14]. BALOs were recently linked to a healthy  
64 human gut microbiome [15], and proposed as living antibiotics in medical treatment  
65 [16] and water remediation [17]. Additionally, a microcosm experiment showed that  
66 their predatory activity can exceed phage-induced mortality [18]. We here draw  
67 attention to this neglected group of predators and tested their association with  
68 microbial diversity as an indicator of a healthy microbiome across distinct animal host  
69 groups and environments.

70  
71 We analyzed 16S rRNA data from randomly chosen, exemplary host taxa that are  
72 representative of distinct animal taxonomic groups, including early branching  
73 metazoans, ecdysozoa, selected vertebrates, and additionally home surfaces (Table  
74 S1 and Supplementary Methods). We only considered studies, if they included  
75 samples with and without BALOs, thereby allowing us to determine the consequences  
76 of BALO presence and absence in comparable groups. We determined BALO  
77 occurrence (although not necessarily activity) by identifying OTUs that showed 97%  
78 sequence identity to members of the BALO-containing taxonomic groups  
79 *Bdellovibrionales* (including the families *Bacteriovoracaceae* and *Bdellovibrionaceae*)  
80 and *Micavibrionales* (including *Micavibrionaceae*). From these data, we inferred  
81 relative BALO abundance and corresponding microbiome alpha- (i.e., Shannon-  
82 Wiener diversity, Simpson's diversity, richness) and beta-diversities.

83  
84 The presence of BALOs was associated with a significantly higher Simpson and  
85 Shannon diversity for the microbiomes of seven and five host species, respectively, as  
86 well as the home surfaces (Figure 1, Table S2). The main exceptions referred to two  
87 sponge species, *Carteriospongia foliascens* and *Ircinia variabilis*, which showed a  
88 significantly higher alpha-diversity in the absence of BALOs. This negative association  
89 was not observed for microbiome richness (Figure S1, Table S3). Our subsequent  
90 analysis of absolute OTU numbers revealed that microbiome richness is significantly  
91 associated with both BALO abundance (Figure 2a, Table S4) and BALO richness  
92 (Figure 2b, Table S4) in case of *H. vulgaris* and the sponges. A trend toward this  
93 association was additionally observed for *N. vectensis* and *D. melanogaster*.

94 Interestingly, for both host systems, OTU richness was highest with medium BALO  
 95 abundance, which possibly indicates that BALO richness rather than abundance  
 96 influences microbiome richness.  
 97

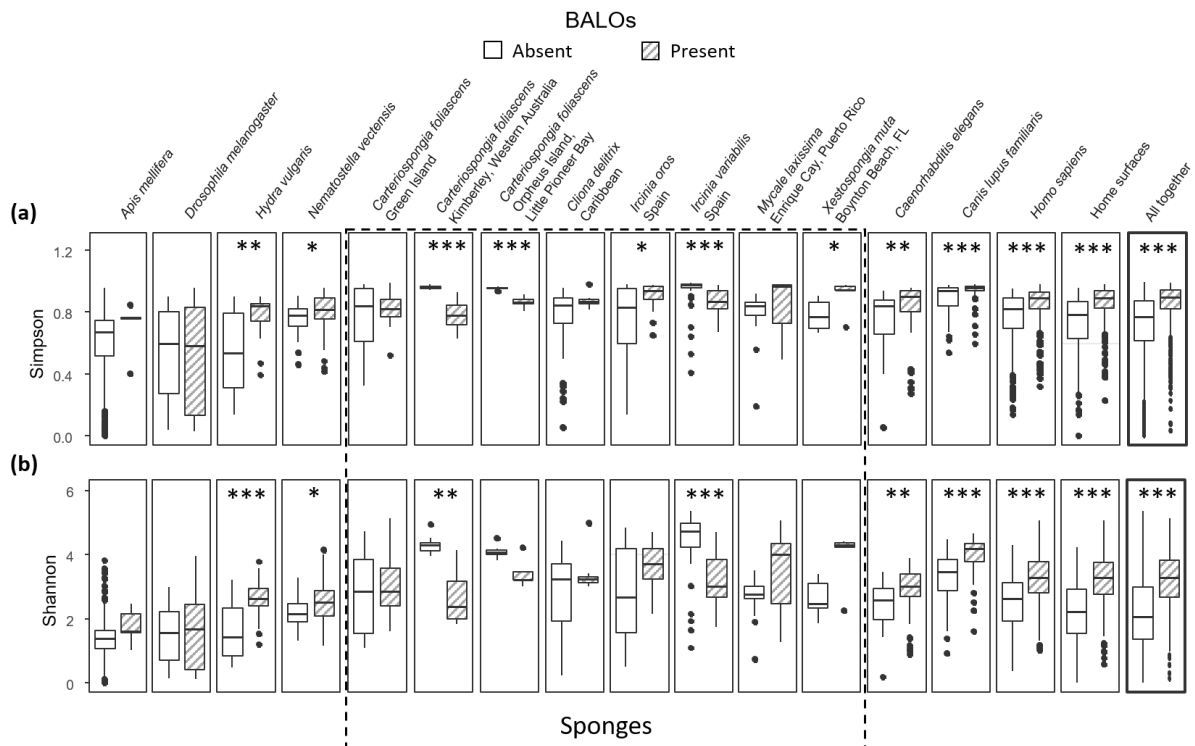

98  
 99

100 **Fig. 1.** Microbiome alpha-diversity in the presence and absence of BALOs. The  
 101 Simpson (a) and Shannon (b) diversity is shown for a set of different hosts. Significant  
 102 differences are indicated by asterisks and were calculated using the Wilcoxon rank  
 103 sum test. P-values:  $p < 0.001$ : '\*\*\*',  $0.0011 > p < 0.01$ : '\*\*',  $0.011 > p < 0.05$ : '\*'. P-values are  
 104 given in the Table S2.

105  
 106

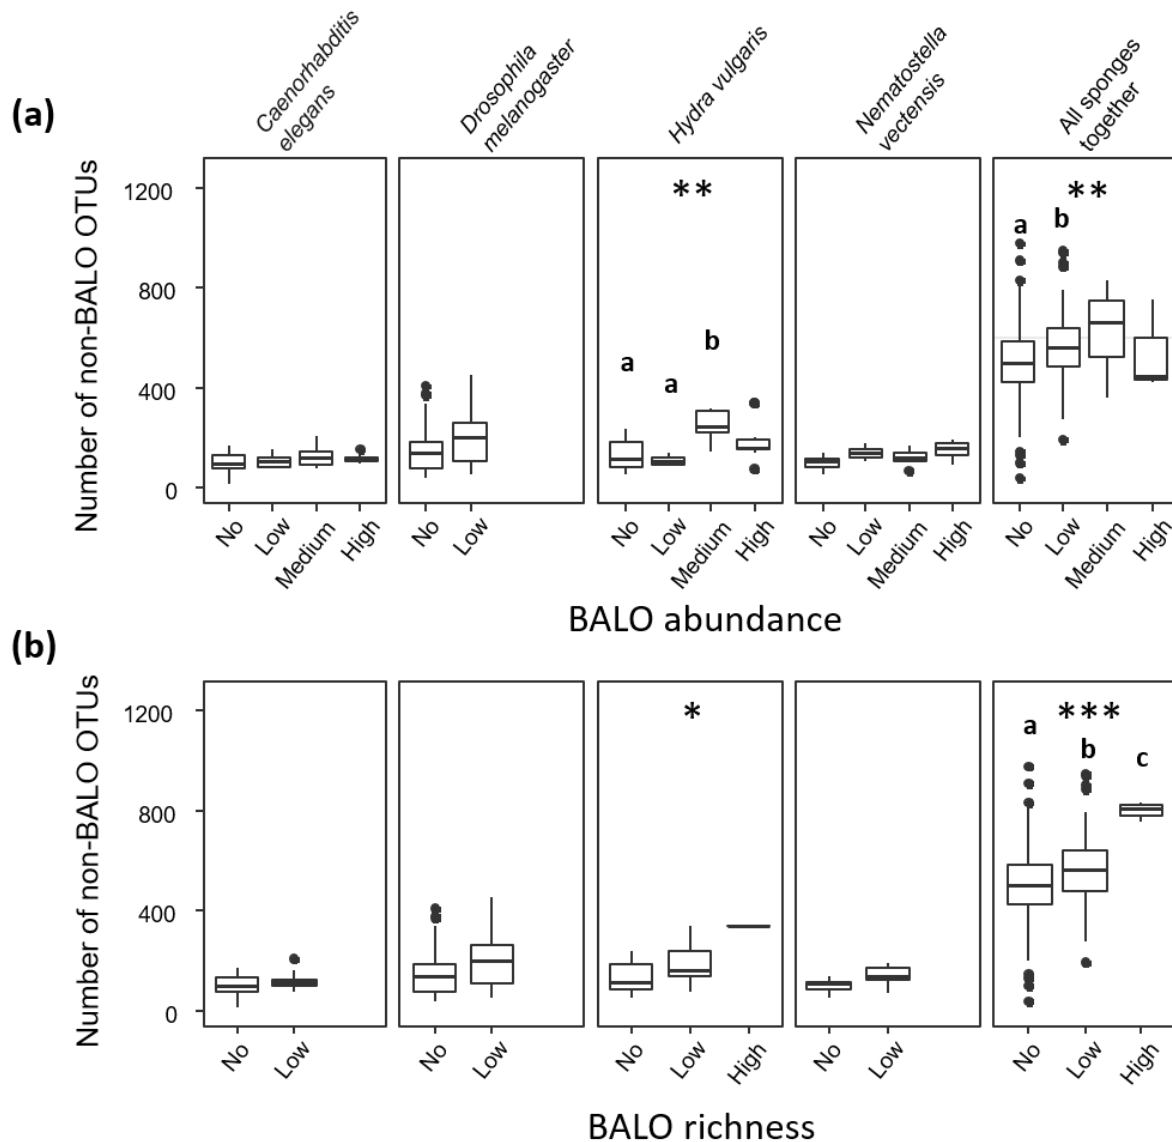

107  
 108 **Fig. 2.** Host microbiome richness measured as number of different non-BALO OTUs  
 109 with increasing BALO abundance (a) and BALO richness (b). Significant differences  
 110 are indicated by asterisks and were calculated using the Kruskal-Wallis rank sum test.  
 111 P-values:  $p < 0.001$ : '\*\*\*',  $0.0011 > p < 0.01$ : '\*\*',  $0.011 > p < 0.05$ : '\*'. Significant differences  
 112 between single categories of BALO abundance and BALO richness are indicated by  
 113 different letters and were calculated with Dunn's post hoc test. All P-values are given  
 114 in the Table S4.

115  
 116  
 117 In contrast, variation in microbiome beta-diversity was not linked to the BALOs (Figure  
 118 3). At the same time, our PCoA analysis indicated an influence of BALOs on sample  
 119 clustering for several hosts (especially cnidarians and *C. elegans*). However, the  
 120 clustering was not independent of sample type, making it impossible to infer the exact  
 121 cause of clustering from the current data.

122 To exclude that BALO presence is caused by high microbiome diversity as a  
 123 consequence of sampling effects, we analyzed the complete sponge dataset,  
 124 additionally including species without BALOs [19]. We found that alpha-diversity *per*  
 125 *se* does not predict the presence of BALOs (Table S5 and S6), which is therefore  
 126 unlikely caused by sampling effects alone.

127

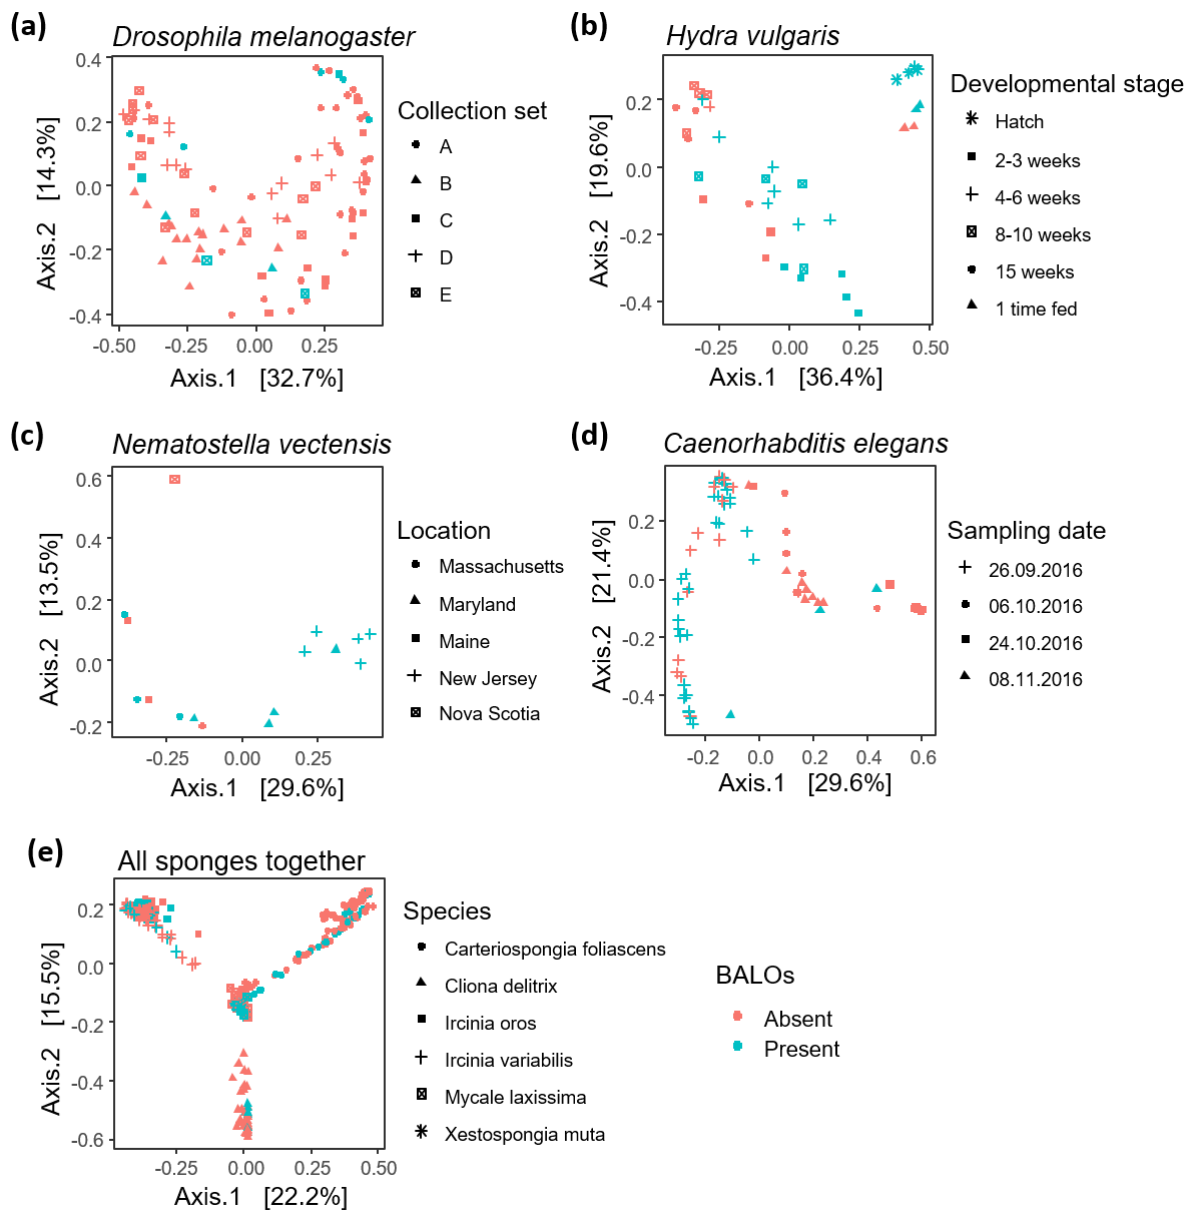

128

129

130 **Fig. 3.** PCoA of microbiome samples from different hosts using Bray Curtis distances.

131 Samples are color-coded by presence and absence of BALOs. Different shapes

132 indicate different sample subsets as indicated by the respective legends.

133

134

135 The loss of top predators has comprehensive effects on community structure [9, 10].

136 We tested this idea by comparing microbiome alpha-diversities for distinct animal hosts

137 and environments that either lacked or contained a prominent group of microbial

138 predators, the BALOs. With the exception of the considered insects and most sponge

139 species, we found that microbiomes containing BALOs were characterized by a

140 significantly higher alpha-diversity.

141 In contrast to the overall results, two sponge species showed a negative correlation

142 between BALO presence and microbiome diversity, although not when considering

143 microbiome richness. These results may suggest that BALO-containing sponges

144 harbor a more species-rich, but less even microbiome. Notably, sponges in general

145 possess a comparatively species-rich microbiome (Figure S1). In these cases,  
146 evenness may be negatively correlated to richness, consistent with previous  
147 observations for plant communities [20] and possibly due to sampling effects, where a  
148 superior competitor is more likely present in species-rich communities [1]. A niche-  
149 preemption model was previously identified to be the best predictor for the patterns in  
150 plant communities [20]. Niche-preemption should favor resource use plasticity among  
151 the less competitive species, resulting in lower growth and consequently reduced  
152 evenness. In case of the sponges, the negative richness-evenness-relationship might  
153 then overshadow the effect of BALOs on microbiome diversity. Temporal effects could  
154 additionally explain the higher sponge microbiome diversity in the absence of BALOs.  
155 As the sponge data used in this study came from single time point samples, we cannot  
156 exclude subsequent changes in the community structure, for example a delayed effect  
157 of BALO loss or gain on microbiome diversity. However, the longitudinal data on  
158 surface microbiomes [21] indicates that changes in BALO presence/absence are  
159 associated with more or less simultaneously occurring changes in OTU richness (Fig.  
160 S2).

161 We found that BALO OTU richness, rather than abundance, is significantly associated  
162 with microbiome richness in *H. vulgaris* and the combined set of sponges. Moreover,  
163 this significant association between BALO and microbiome richness was only  
164 observed when the high BALO richness category could be included. Considering that  
165 different BALO strains are known to vary in their range of suitable prey [22], the above  
166 results may suggest that a more diverse BALO community is able to prey on a more  
167 diverse set of bacteria and thereby reduces the predation pressure on single species,  
168 thus increasing microbiome diversity.

169 Our additional analysis of beta-diversity did not reveal a strong BALO influence on  
170 microbiome community structure. Together with the results on alpha-diversity, this may  
171 imply that BALO presence is not correlated with a specific community composition and  
172 that BALOs survive in a range of differently assembled communities.

173 Our results from a range of distinct animal hosts and environments point to BALOs as  
174 potential drivers of microbiome alpha-diversity, possibly by actively preying on highly  
175 abundant species, thereby favoring rare species. Thus, BALOs may be of particular  
176 importance for our understanding of the stability and resilience of microbiome  
177 ecosystem functions. Our current meta-analysis is, however, based on associations,  
178 which can only be indicative of possible causal relationships. An important next step  
179 should therefore be a detailed experimental analysis of the exact causal role of BALOs  
180 on microbiome diversity and resulting functions. It would be of similar high interest to  
181 assess to what extent other kinds of bacterial antagonists, such as phages, or  
182 environmental stressors may also influence microbiome diversity and the associated  
183 effects. Moreover, it is worth testing whether the interaction between BALOs and other  
184 bacteria is additionally shaped by the host immune system, which could cause different  
185 dynamics of the BALO-mediated effects within rather than outside host organisms.

186 Considering that BALOs are not pathogenic to higher organisms [23], have a likely  
187 stronger effect on community structure than phages [18], and appear to enhance  
188 microbial diversity, they are highly promising candidates for probiotic therapy [24] that  
189 aims at restoring disturbed microbiomes and improving host health or ecosystem  
190 productivity and stability.

191

192

193 **Acknowledgement**

194

195 We are grateful for advice from members of the Schulenburg group and the  
196 Collaborative Research Center CRC1182 on Origin and Function of Metaorganisms.  
197 This work was funded by the CRC1182, projects A4 and B2.

198  
199

## 200 **Conflict of interest statement**

201

202 The authors declare no conflict of interest.

203

## 204 **References**

205

206 1. Cardinale BJ, Srivastava DS, Duffy JE, et al (2006) Effects of biodiversity on the  
207 functioning of trophic groups and ecosystems. *Nature* 443:989–992.  
208 <https://doi.org/10.1038/Nature05202>

209 2. Boyer KE, Kertesz JS, Bruno JF Biodiversity effects on productivity and stability  
210 of marine macroalgal communities: the role of environmental context. *Oikos*  
211 118:1062–1072. <https://doi.org/10.1111/j.1600-0706.2009.17252.x>

212 3. Power ME, Tilman D, Estes JA, et al (1996) Challenges in the quest for  
213 keystones. *BioScience* 46:609–620. <https://doi.org/10.2307/1312990>

214 4. Thompson R, Starzomski BM (2007) What does biodiversity actually do? A  
215 review for managers and policy makers. *Biodivers Conserv* 16:1359–1378.  
216 <https://doi.org/10.1007/s10531-005-6232-9>

217 5. Naeem S, Li SB (1997) Biodiversity enhances ecosystem reliability. *Nature*  
218 390:507–509. <https://doi.org/10.1038/37348>

219 6. Yachi S, Loreau M (1999) Biodiversity and ecosystem productivity in a  
220 fluctuating environment: The insurance hypothesis. *Proc Natl Acad Sci* 96:1463–  
221 1468. <https://doi.org/10.1073/pnas.96.4.1463>

222 7. Holling CS (1973) Resilience and stability of ecological systems. *Annu Rev Ecol*  
223 *Syst* 4:1–23. <https://doi.org/10.1146/annurev.es.04.110173.000245>

224 8. Thebault E, Loreau M (2003) Food-web constraints on biodiversity-ecosystem  
225 functioning relationships. *Proc Natl Acad Sci U S A* 100:14949–14954.  
226 <https://doi.org/10.1073/pnas.2434847100>

227 9. Jabiol J, McKie BG, Bruder A, et al Trophic complexity enhances ecosystem  
228 functioning in an aquatic detritus-based model system. *J Anim Ecol* 82:1042–  
229 1051. <https://doi.org/10.1111/1365-2656.12079>

230 10. Gessner MO, Swan CM, Dang CK, et al (2010) Diversity meets decomposition.  
231 *Trends Ecol Evol* 25:372–380. <https://doi.org/10.1016/j.tree.2010.01.010>

232 11. Leitão RP, Zuanon J, Villéger S, et al (2016) Rare species contribute  
233 disproportionately to the functional structure of species assemblages. *Proc R*  
234 *Soc B Biol Sci* 283:20160084. <https://doi.org/10.1098/rspb.2016.0084>



- 235 12. Callens M, Watanabe H, Kato Y, et al (2018) Microbiota inoculum composition  
236 affects holobiont assembly and host growth in *Daphnia*. *Microbiome* 6:.  
237 <https://doi.org/10.1186/s40168-018-0444-1>
- 238 13. Sockett RE (2009) Predatory lifestyle of *Bdellovibrio bacteriovorus*. *Annu Rev*  
239 *Microbiol* 63:523–539. <https://doi.org/10.1146/annurev.micro.091208.073346>
- 240 14. Rotem O, Pasternak Z, Jurkevitch E (2014) *Bdellovibrio* and like organisms. In:  
241 Rosenberg E, DeLong EF, Lory S, et al (eds) *The Prokaryotes*. Springer Berlin  
242 Heidelberg, Berlin, Heidelberg, pp 3–17
- 243 15. Iebba V, Santangelo F, Totino V, et al (2013) Higher prevalence and abundance  
244 of *Bdellovibrio bacteriovorus* in the human gut of healthy subjects. *Plos One* 8:.  
245 <https://doi.org/10.1371/journal.pone.0061608>
- 246 16. Negus D, Moore C, Baker M, et al (2017) Predator versus pathogen: How does  
247 predatory *Bdellovibrio bacteriovorus* interface with the challenges of killing  
248 Gram-negative pathogens in a host setting? *Annu Rev Microbiol* 71:441–457.  
249 <https://doi.org/10.1146/annurev-micro-090816-093618>
- 250 17. Kandel PP, Pasternak Z, van Rijn J, et al (2014) Abundance, diversity and  
251 seasonal dynamics of predatory bacteria in aquaculture zero discharge systems.  
252 *FEMS Microbiol Ecol* 89:149–161. <https://doi.org/10.1111/1574-6941.12342>
- 253 18. Chen H, Laws EA, Martin JL, et al (2018) Relative Contributions of  
254 *Halobacteriovorax* and Bacteriophage to Bacterial Cell Death under Various  
255 Environmental Conditions. *mBio* 9:e01202-18.  
256 <https://doi.org/10.1128/mBio.01202-18>
- 257 19. Thomas T, Moitinho-Silva L, Lurgi M, et al (2016) Diversity, structure and  
258 convergent evolution of the global sponge microbiome. *Nat Commun* 7:11870.  
259 <https://doi.org/10.1038/ncomms11870>
- 260 20. Zhang H, John R, Peng Z, et al (2012) The relationship between species  
261 richness and evenness in plant communities along a successional gradient: A  
262 study from sub-alpine meadows of the eastern Qinghai-Tibetan plateau, China.  
263 *PLoS ONE* 7:.. <https://doi.org/10.1371/journal.pone.0049024>
- 264 21. Jurkevitch E, Minz D, Ramati B, Barel G (2000) Prey range characterization,  
265 ribotyping, and diversity of soil and rhizosphere *Bdellovibrio* spp. isolated on  
266 phytopathogenic bacteria. *Appl Env Microbiol* 66:2365–71
- 267 22. Gupta S, Tang C, Tran M, Kadouri DE (2016) Effect of Predatory Bacteria on  
268 Human Cell Lines. *PLOS ONE* 11:e0161242.  
269 <https://doi.org/10.1371/journal.pone.0161242>
- 270 23. Dwidar M, Monnappa AK, Mitchell RJ (2012) The dual probiotic and antibiotic  
271 nature of *Bdellovibrio bacteriovorus*. *BMB Rep* 45:71–78.  
272 <https://doi.org/10.5483/BMBRep.2012.45.2.71>
- 273 24. Mortzfeld BM, Urbanski S, Reitzel AM, et al (2016) Response of bacterial  
274 colonization in *Nematostella vectensis* to development, environment and

- 275 biogeography. Environ Microbiol 18:1764–1781. <https://doi.org/10.1111/1462->  
276 2920.12926
- 277 25. Adair KL, Wilson M, Bost A, Douglas AE (2018) Microbial community assembly  
278 in wild populations of the fruit fly *Drosophila melanogaster*. ISME J 12:959–972.  
279 <https://doi.org/10.1038/s41396-017-0020-x>
- 280 26. Song SJ, Lauber C, Costello EK, et al (2013) Cohabiting family members share  
281 microbiota with one another and with their dogs. eLife 2:e00458.  
282 <https://doi.org/10.7554/eLife.00458>
- 283 27. Lax S, Smith DP, Hampton-Marcell J, et al (2014) Longitudinal analysis of  
284 microbial interaction between humans and the indoor environment. Science  
285 345:1048–1052. <https://doi.org/10.1126/science.1254529>
- 286 28. Franzenburg S, Fraune S, Altrock PM, et al (2013) Bacterial colonization of  
287 Hydra hatchlings follows a robust temporal pattern. ISME J 7:781–790.  
288 <https://doi.org/10.1038/ismej.2012.156>
- 289
- 290

## Supplementary Material

### 291 ***Bdellovibrio* and Like Organisms are Predictors of** 292 **Microbiome Diversity across Diverse Host Groups**

293 **Julia Johnke<sup>1</sup>, Sebastian Fraune<sup>2</sup>, Thomas Bosch<sup>2</sup>, Ute Hentschel<sup>3,4</sup>, and Hinrich**  
294 **Schulenburg<sup>1\*</sup>**

295 <sup>1</sup>Department of Evolutionary Ecology and Genetics, Zoological Institute, CAU Kiel, Am  
296 Botanischen Garten 1-9, 24118 Kiel, Germany

297 <sup>2</sup>Department of Cell and Developmental Biology, Zoological Institute, CAU Kiel, Am  
298 Botanischen Garten 1-9, 24118 Kiel, Germany

299 <sup>3</sup>RD3 Marine Microbiology, GEOMAR Helmholtz Centre for Ocean Research Kiel,  
300 Düsternbrooker Weg 20, 24105 Kiel, Germany.

301 <sup>4</sup>Section of Marine Biology, CAU Kiel, Am Botanischen Garten 1-9, 24118 Kiel, Germany.

302 \* **Corresponding author:** Hinrich Schulenburg  
303 [hschulenburg@zoologie.uni-kiel.de](mailto:hschulenburg@zoologie.uni-kiel.de)

304

#### 305 **1 Supplementary Methods**

306 For our analysis, we randomly selected exemplary host taxa that are representative of distinct  
307 taxonomic animal groups, ranging from very simple to more complex hosts and including early  
308 branching invertebrates, ecdysozoa, and also vertebrates (Table S1). In addition, we only  
309 considered host taxa, for which a single study included at least five samples with and without  
310 BALOs - with the exception of the *Nematostella* dataset with only four samples without BALOs.  
311 This preselection was performed in order to allow a direct comparison of samples with and  
312 without BALOs for each host system or environment. Further, only studies with publicly  
313 available OTU tables were selected. Moreover, we considered one study with longitudinal data  
314 generated from human mucus, sebum, skin swabs, as well as from different surfaces from  
315 their family homes [10]. This data set served to test the stability of the association of BALO  
316 presence and bacterial community diversity across time within the same environment.  
317 Several datasets were from microbiomeDB (<http://microbiomedb.org/mbio/>) and only included  
318 relative abundance data, while the remaining data sets also had information on absolute  
319 frequencies. The *Caenorhabditis elegans* dataset was produced by us for this study by  
320 sampling worms from the Kiel Botanical garden in 2016 at four consecutive time points (one in  
321 October, two in September, and one in November). Worm samples were prepared as  
322 described previously [1] by using the protocol for “natural worm” microbiome extraction. DNA  
323 was sequenced using the Miseq platform and the primers 515f-806r to sequence the V4 region  
324 of the 16S rRNA gene. Original sequence data are available from the European Nucleotide  
325 Archive (accession number PRJEB30476). Sequence reads were analyzed using Mothur v.  
326 1.39.5 [2] as described in the Miseq SOP ([https://www.mothur.org/wiki/MiSeq\\_SOP](https://www.mothur.org/wiki/MiSeq_SOP)) and the  
327 SILVA reference database version 128. OTU clustering was based on 97% sequence identity.  
328 Samples with BALOs were categorized based on their abundance (i.e., high (11-227 reads),  
329 medium (6-10), low (1-5), and no reads) and richness (high (5-7), low (1-4), and no). We  
330 compared microbiome alpha-diversity in the presence and absence of BALOs using two-  
331 sample Wilcoxon rank sum tests to account for outliers. We assessed the influence of BALO  
332 abundance or richness on microbiome richness with the Kruskal-Wallis rank sum test and  
333 Dunn’s post hoc test with p-value adjustment using *fdr*. Beta-diversity was measured using  
334 Bray Curtis distance on relative abundance and visualized using PCoA of the 500 most  
335 abundant OTUs. Sponge samples were analyzed using Fisher’s exact test and the Wilcoxon  
336 rank sum test to test for an association between BALO presence/absence and microbiome  
337 alpha-diversity, either as categorical or continuous variable. All statistical analyses were  
338 performed in R [3] using phyloseq [4] and vegan [5].

339 **2 Supplementary Figures and Tables**

340 Table S1: Summary of the considered and analyzed studies.

| Study                                                       | Host body site                                 | Seq. platform       | Environment of host                                                      | N samples   | Normalization         | Further information                                                                                         |
|-------------------------------------------------------------|------------------------------------------------|---------------------|--------------------------------------------------------------------------|-------------|-----------------------|-------------------------------------------------------------------------------------------------------------|
| <b><i>Caenorhabditis elegans</i> (Nematoda)</b>             |                                                |                     |                                                                          |             |                       |                                                                                                             |
| <b>This study*</b>                                          | Gut                                            | Miseq (V4)          | Natural isolates from compost heaps                                      | 73          | 4986 reads per sample | Time series                                                                                                 |
| <b><i>Nematostella vectensis</i> (Cnidaria)</b>             |                                                |                     |                                                                          |             |                       |                                                                                                             |
| <b>[6]</b>                                                  | Whole animals                                  | 454 (V2)            | Natural isolates, but maintained in the lab for 10 years as clonal lines | 16          | 3000 reads per sample | Microbiome diversity of species sampled along the US east coast                                             |
| <b>Six sponge species</b>                                   |                                                |                     |                                                                          |             |                       |                                                                                                             |
| <b>[7]</b>                                                  | Random sponge pieces                           | Hiseq (V4)          | Natural isolates from different sites                                    | 315 samples | No normalization      | Different species and different sampling sites                                                              |
| <b><i>Drosophila melanogaster</i> (Insecta, Diptera)</b>    |                                                |                     |                                                                          |             |                       |                                                                                                             |
| <b>[8]</b>                                                  | Whole flies                                    | Miseq (V3-V4)       | Samples taken from various kitchen                                       | 79          | 1200 reads per sample | Only adult flies                                                                                            |
| <b><i>Apis mellifera</i> (Insecta, Hymenoptera)</b>         |                                                |                     |                                                                          |             |                       |                                                                                                             |
| <b>Unpublished, Dominguez-Bello</b>                         | whole head, whole larva, whole pupa, whole gut | Unknown             | Unknown                                                                  | 383         | Unknown               | From microbiomeDB, different functional guilds and developmental stages, effect of Tetracycline application |
| <b><i>Canis lupus familiaris</i> (Vertebrata, Mammalia)</b> |                                                |                     |                                                                          |             |                       |                                                                                                             |
| <b>[9]</b>                                                  | Sebum                                          | Illumina GAIIx (V2) | Different homes                                                          | 145         | 5000 reads per sample | From microbiomeDB, most BALOs in sebum und mucus                                                            |
| <b>Home surfaces</b>                                        |                                                |                     |                                                                          |             |                       |                                                                                                             |
| <b>[10]</b>                                                 | Different surfaces from family homes           | Hiseq (V4)          | Different homes                                                          | 690         | 2500 reads per sample | From microbiomeDB                                                                                           |
| <b><i>Homo sapiens</i> (Vertebrata, Mammalia)</b>           |                                                |                     |                                                                          |             |                       |                                                                                                             |
| <b>[10]</b>                                                 | Mucus, sebum, skin swabs                       | Hiseq (V4)          | Different homes                                                          | 910         | 2500 reads per sample | From microbiomeDB                                                                                           |
| <b><i>Hydra vulgaris</i> (Cnidaria)</b>                     |                                                |                     |                                                                          |             |                       |                                                                                                             |
| <b>[11]</b>                                                 | Whole animals                                  | 454 (V1-V2)         | Lab-kept animals                                                         | 36          | No normalization      | Developmental data                                                                                          |

341

342

343 Table S2: Test statistics of the comparison of microbiome alpha-diversity in the absence and  
 344 presence of BALOs as shown in Fig. 1.

| diversity measure | host                                                                  | W      | P        |
|-------------------|-----------------------------------------------------------------------|--------|----------|
| <b>Simpson</b>    | <i>Apis mellifera</i>                                                 | 594    | 0.1541   |
| <b>Simpson</b>    | <i>Caenorhabditis elegans</i>                                         | 774    | 0.001617 |
| <b>Simpson</b>    | <i>Canis lupus familiaris</i>                                         | 1382   | < 0.001  |
| <b>Simpson</b>    | <i>Drosophila melanogaster</i>                                        | 506    | 0.9089   |
| <b>Simpson</b>    | <i>Homo sapiens</i>                                                   | 57463  | < 0.001  |
| <b>Simpson</b>    | <i>Nematostella vectensis</i>                                         | 736    | 0.03724  |
| <b>Simpson</b>    | Family homes                                                          | 27095  | < 0.001  |
| <b>Simpson</b>    | <i>Hydra vulgaris</i>                                                 | 68     | < 0.001  |
| <b>Simpson</b>    | <i>Carteriospongia foliascens</i> _Green Island                       | 91     | 0.589    |
| <b>Simpson</b>    | <i>Carteriospongia foliascens</i> _Kimberley, Western Australia       | 48     | < 0.001  |
| <b>Simpson</b>    | <i>Carteriospongia foliascens</i> _Orpheus Island, Little Pioneer Bay | 50     | < 0.001  |
| <b>Simpson</b>    | <i>Cliona delitrix</i> _Caribbean                                     | 140    | 0.3135   |
| <b>Simpson</b>    | <i>Ircinia oros</i> _Spain                                            | 148    | 0.01725  |
| <b>Simpson</b>    | <i>Ircinia variabilis</i> _Spain                                      | 425    | < 0.001  |
| <b>Simpson</b>    | <i>Mycale laxissima</i> _Enrique Cay, Puerto Rico                     | 35     | 0.1653   |
| <b>Simpson</b>    | <i>Xestospongia muta</i> _Boynton Beach, FL                           | 5      | 0.04798  |
| <b>Simpson</b>    | All together                                                          | 486490 | < 0.001  |
| <b>Shannon</b>    | <i>Apis mellifera</i>                                                 | 557    | 0.1151   |
| <b>Shannon</b>    | <i>Caenorhabditis elegans</i>                                         | 792    | 0.0025   |
| <b>Shannon</b>    | <i>Canis lupus familiaris</i>                                         | 1019   | < 0.001  |
| <b>Shannon</b>    | <i>Drosophila melanogaster</i>                                        | 487    | 0.9348   |
| <b>Shannon</b>    | <i>Homo sapiens</i>                                                   | 49350  | < 0.001  |
| <b>Shannon</b>    | <i>Nematostella vectensis</i>                                         | 729    | 0.0327   |
| <b>Shannon</b>    | Family homes                                                          | 22200  | < 0.001  |
| <b>Shannon</b>    | <i>Hydra vulgaris</i>                                                 | 58     | < 0.001  |
| <b>Shannon</b>    | <i>Carteriospongia foliascens</i> _Green Island                       | 85     | 0.4231   |
| <b>Shannon</b>    | <i>Carteriospongia foliascens</i> _Kimberley, Western Australia       | 45     | 0.004662 |
| <b>Shannon</b>    | <i>Carteriospongia foliascens</i> _Orpheus Island, Little Pioneer Bay | 41     | 0.05528  |
| <b>Shannon</b>    | <i>Cliona delitrix</i> _Caribbean                                     | 159    | 0.6025   |
| <b>Shannon</b>    | <i>Ircinia oros</i> _Spain                                            | 185    | 0.1247   |
| <b>Shannon</b>    | <i>Ircinia variabilis</i> _Spain                                      | 417    | < 0.001  |
| <b>Shannon</b>    | <i>Mycale laxissima</i> _Enrique Cay, Puerto Rico                     | 35     | 0.1653   |
| <b>Shannon</b>    | <i>Xestospongia muta</i> _Boynton Beach, FL                           | 6      | 0.07323  |
| <b>Shannon</b>    | All together                                                          | 415580 | < 0.001  |

345

346 Table S3: Test statistics of the comparison of microbiome richness in the presence and  
347 absence of BALOs as shown in Fig. S1.

| <b>Host</b>                                                           | <b>W</b> | <b>P</b> |
|-----------------------------------------------------------------------|----------|----------|
| <i>Caenorhabditis elegans</i>                                         | 178.5    | 0.06802  |
| <i>Drosophila melanogaster</i>                                        | 348      | 0.1102   |
| <i>Hydra vulgaris</i>                                                 | 88.5     | 0.003041 |
| <i>Nematostella vectensis</i>                                         | 11       | 0.1293   |
| All sponges together                                                  | 4531.5   | < 0.001  |
| <i>Carteriospongia foliascens</i> _Green Island                       | 144      | < 0.001  |
| <i>Carteriospongia foliascens</i> _Kimberley, Western Australia       | 70       | 0.9321   |
| <i>Carteriospongia foliascens</i> _Orpheus Island, Little Pioneer Bay | 116      | 0.4946   |
| <i>Cliona delitrix</i> _Caribbean                                     | 468      | 0.021    |
| <i>Ircinia oros</i> _Spain                                            | 518      | < 0.001  |
| <i>Ircinia variabilis</i> _Spain                                      | 664      | 0.01112  |
| <i>Mycale laxissima</i> _Enrique Cay, Puerto Rico                     | 220      | 0.9319   |
| <i>Xestospongia muta</i> _Boynton Beach, FL'                          | 42       | 0.1058   |

348

349 Table S4: Test statistics of the comparison of microbiome richness and BALO abundance  
 350 and BALO richness as shown in Fig. 2.

| host                           | category       | Kruskal-Wallis<br>Chi-squared | Df | P        | Significant Dunn's                                            |
|--------------------------------|----------------|-------------------------------|----|----------|---------------------------------------------------------------|
| <i>Caenorhabditis elegans</i>  | BALO abundance | 3.3508                        | 1  | 0.06717  |                                                               |
| <i>Drosophila melanogaster</i> | BALO abundance | 6.3712                        | 3  | 0.09488  |                                                               |
| <i>Hydra vulgaris</i>          | BALO abundance | 12.795                        | 3  | 0.005102 | Medium:Low P = 0.014,<br>No:Medium P = 0.011                  |
| <i>Nematostella vectensis</i>  | BALO abundance | 3.7776                        | 3  | 0.2865   |                                                               |
| All sponges together           | BALO abundance | 14.573                        | 3  | 0.002221 | No:Low P = 0.0033                                             |
| <i>Caenorhabditis elegans</i>  | BALO diversity | 4.2926                        | 3  | 0.2316   |                                                               |
| <i>Drosophila melanogaster</i> | BALO diversity | 2.5684                        | 1  | 0.109    |                                                               |
| <i>Hydra vulgaris</i>          | BALO diversity | 6.7652                        | 2  | 0.03396  |                                                               |
| <i>Nematostella vectensis</i>  | BALO diversity | 2.489                         | 1  | 0.1146   |                                                               |
| All sponges together           | BALO diversity | 17.87                         | 2  | < 0.001  | No:Low P = 0.0032, No:High P =<br>0.0053, Low:High P = 0.0349 |

351

352 Table S5: Test statistics of the comparison of sponge microbiome alpha-diversity category  
 353 and BALO presence. Contingency tables are based on the average of the respective value  
 354 (given in brackets for the different categories) for each species.

|                      | Microbiome richness <sup>a</sup> |                         | Fisher's Exact Test |            |
|----------------------|----------------------------------|-------------------------|---------------------|------------|
|                      | high ( $\geq 600$ - 809.25)      | low (306.67 - $< 600$ ) | P                   | Odds ratio |
| <b>BALOs present</b> | 10                               | 38                      | 0.7356              | 0.79247    |
| <b>BALOs absent</b>  | 4                                | 12                      |                     |            |

|                      | Microbiome Simpson diversity |                       | Fisher's Exact Test |            |
|----------------------|------------------------------|-----------------------|---------------------|------------|
|                      | high ( $\geq 0.9$ )          | low (0.38 - $< 0.9$ ) | P                   | Odds ratio |
| <b>BALOs present</b> | 17                           | 31                    | 1                   | 1.20297    |
| <b>BALOs absent</b>  | 5                            | 11                    |                     |            |

|                      | Microbiome Shannon diversity |                      | Fisher's Exact Test |            |
|----------------------|------------------------------|----------------------|---------------------|------------|
|                      | high (3.5 - 4.74)            | low (1.7 - $< 3.5$ ) | P                   | Odds ratio |
| <b>BALOs present</b> | 23                           | 25                   | 1                   | 1.17976    |
| <b>BALOs absent</b>  | 7                            | 9                    |                     |            |

355 <sup>a</sup> Microbiome richness is treated as a categorical variable, being either high or low. Cut-offs  
 356 for the two groups are indicated.

357



358 Table S6: Wilcoxon rank sum test statistics of the comparison of sponge microbiome alpha-  
359 diversity in samples either with BALO presence *versus* BALO absence.

| Diversity measure <sup>a</sup> | W   | P      |
|--------------------------------|-----|--------|
| <b>Simpson</b>                 | 324 | 0.3598 |
| <b>Shannon</b>                 | 329 | 0.4018 |
| <b>OTU richness</b>            | 364 | 0.7647 |

360 <sup>a</sup> Microbiome diversity is used as a continuous variable and compared among the two  
361 groups, which are either defined by the presence or the absence of BALOs.

362

363

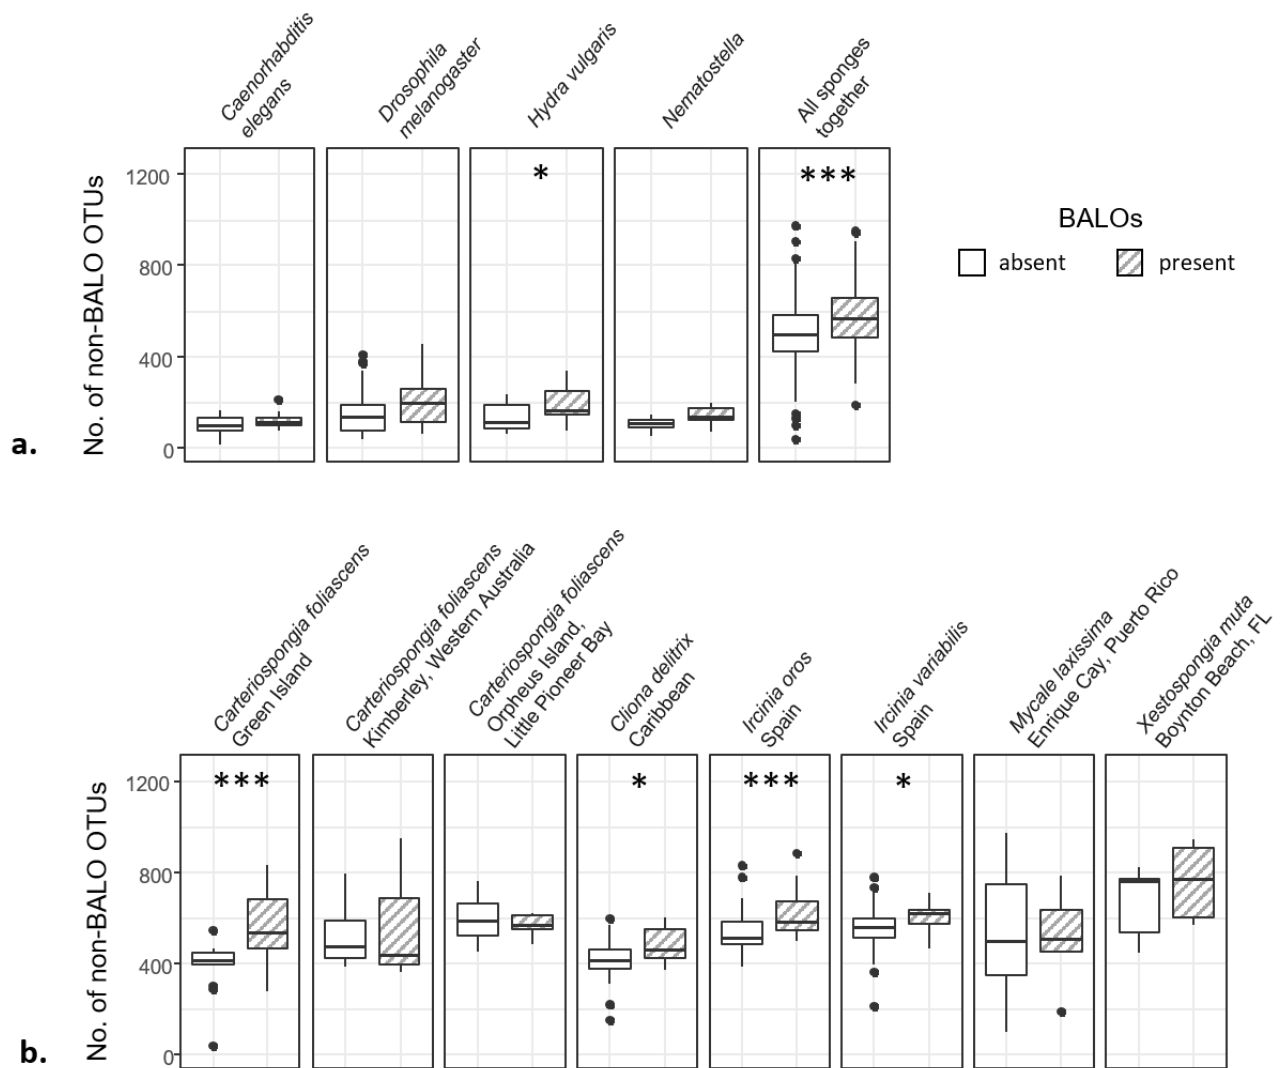

364

365 Fig. S1: Microbiome richness of different hosts (a) and particular sponge species (b)  
366 measured as number of different non-BALO OTUs in the presence and absence of BALOs.  
367 Significant differences are indicated by asterisks and were calculated using the Wilcoxon  
368 rank sum test. P-values:  $p < 0.001$ : '\*\*\*',  $0.0011 > p < 0.01$ : '\*\*',  $0.011 > p < 0.05$ : '\*'. P-values are  
369 given in the Table S3.

370

371

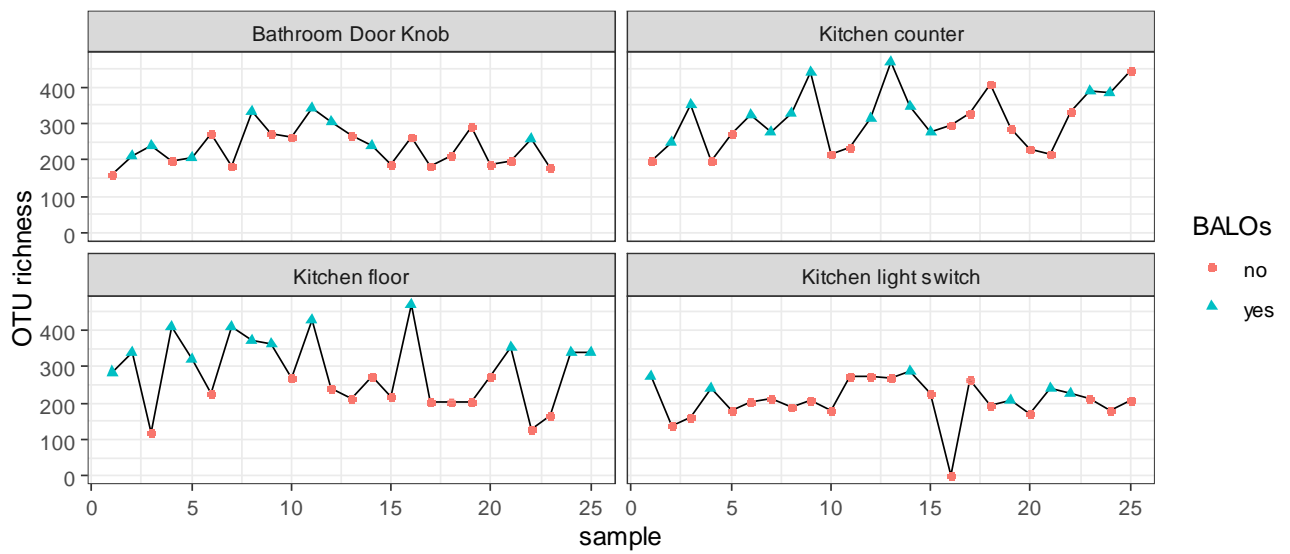

372

373 Fig. S2: Microbiome richness of longitudinal samples from house 05b from [10]. Samples  
374 were taken every other day. Data points are colored and shaped according to the presence  
375 or absence of BALOs.

376

377        **3        Supplementary References**

- 378        1.        Dirksen P, Marsh SA, Braker I, et al (2016) The native microbiome of the nematode  
379        *Caenorhabditis elegans*: gateway to a new host-microbiome model. *BMC Biol* 14:1–16.  
380        <https://doi.org/10.1186/s12915-016-0258-1>
- 381        2.        Schloss PD, Westcott SL, Ryabin T, et al (2009) Introducing mothur: open-source,  
382        platform-independent, community-supported software for describing and comparing  
383        microbial communities. *Appl Environ Microbiol* 75:7537–7541.  
384        <https://doi.org/10.1128/Aem.01541-09>
- 385        3.        R Core Team (2016) R: A language and environment for statistical computing. R  
386        Foundation for Statistical Computing, Vienna, Austria
- 387        4.        McMurdie PJ, Holmes S (2013) phyloseq: An R package for reproducible interactive  
388        analysis and graphics of microbiome census data. *PLOS ONE* 8:e61217.  
389        <https://doi.org/10.1371/journal.pone.0061217>
- 390        5.        Dixon P (2003) VEGAN, a package of R functions for community ecology. *J Veg Sci*  
391        14:927–930. <https://doi.org/10.1111/j.1654-1103.2003.tb02228.x>
- 392        6.        Mortzfeld BM, Urbanski S, Reitzel AM, et al (2016) Response of bacterial colonization in  
393        *Nematostella vectensis* to development, environment and biogeography. *Environ*  
394        *Microbiol* 18:1764–1781. <https://doi.org/10.1111/1462-2920.12926>
- 395        7.        Thomas T, Moitinho-Silva L, Lurgi M, et al (2016) Diversity, structure and convergent  
396        evolution of the global sponge microbiome. *Nat Commun* 7:11870.  
397        <https://doi.org/10.1038/ncomms11870>
- 398        8.        Adair KL, Wilson M, Bost A, Douglas AE (2018) Microbial community assembly in wild  
399        populations of the fruit fly *Drosophila melanogaster*. *ISME J* 12:959–972.  
400        <https://doi.org/10.1038/s41396-017-0020-x>
- 401        9.        Song SJ, Lauber C, Costello EK, et al (2013) Cohabiting family members share  
402        microbiota with one another and with their dogs. *eLife* 2:e00458.  
403        <https://doi.org/10.7554/eLife.00458>
- 404        10.       Lax S, Smith DP, Hampton-Marcell J, et al (2014) Longitudinal analysis of microbial  
405        interaction between humans and the indoor environment. *Science* 345:1048–1052.  
406        <https://doi.org/10.1126/science.1254529>
- 407        11.       Franzenburg S, Fraune S, Altrock PM, et al (2013) Bacterial colonization of *Hydra*  
408        hatchlings follows a robust temporal pattern. *ISME J* 7:781–790.  
409        <https://doi.org/10.1038/ismej.2012.156>

410

411
